# Supplementary material for: Evaluation of Sex Differences in Murine Diabetic Ketoacidosis and Neutropenic Models of Invasive Mucormycosis
Source: MDPI journal article supplement (doi:10.3390/jof7040313), 2021-04-18
Supplement: s1 [file s1]

Figure S1

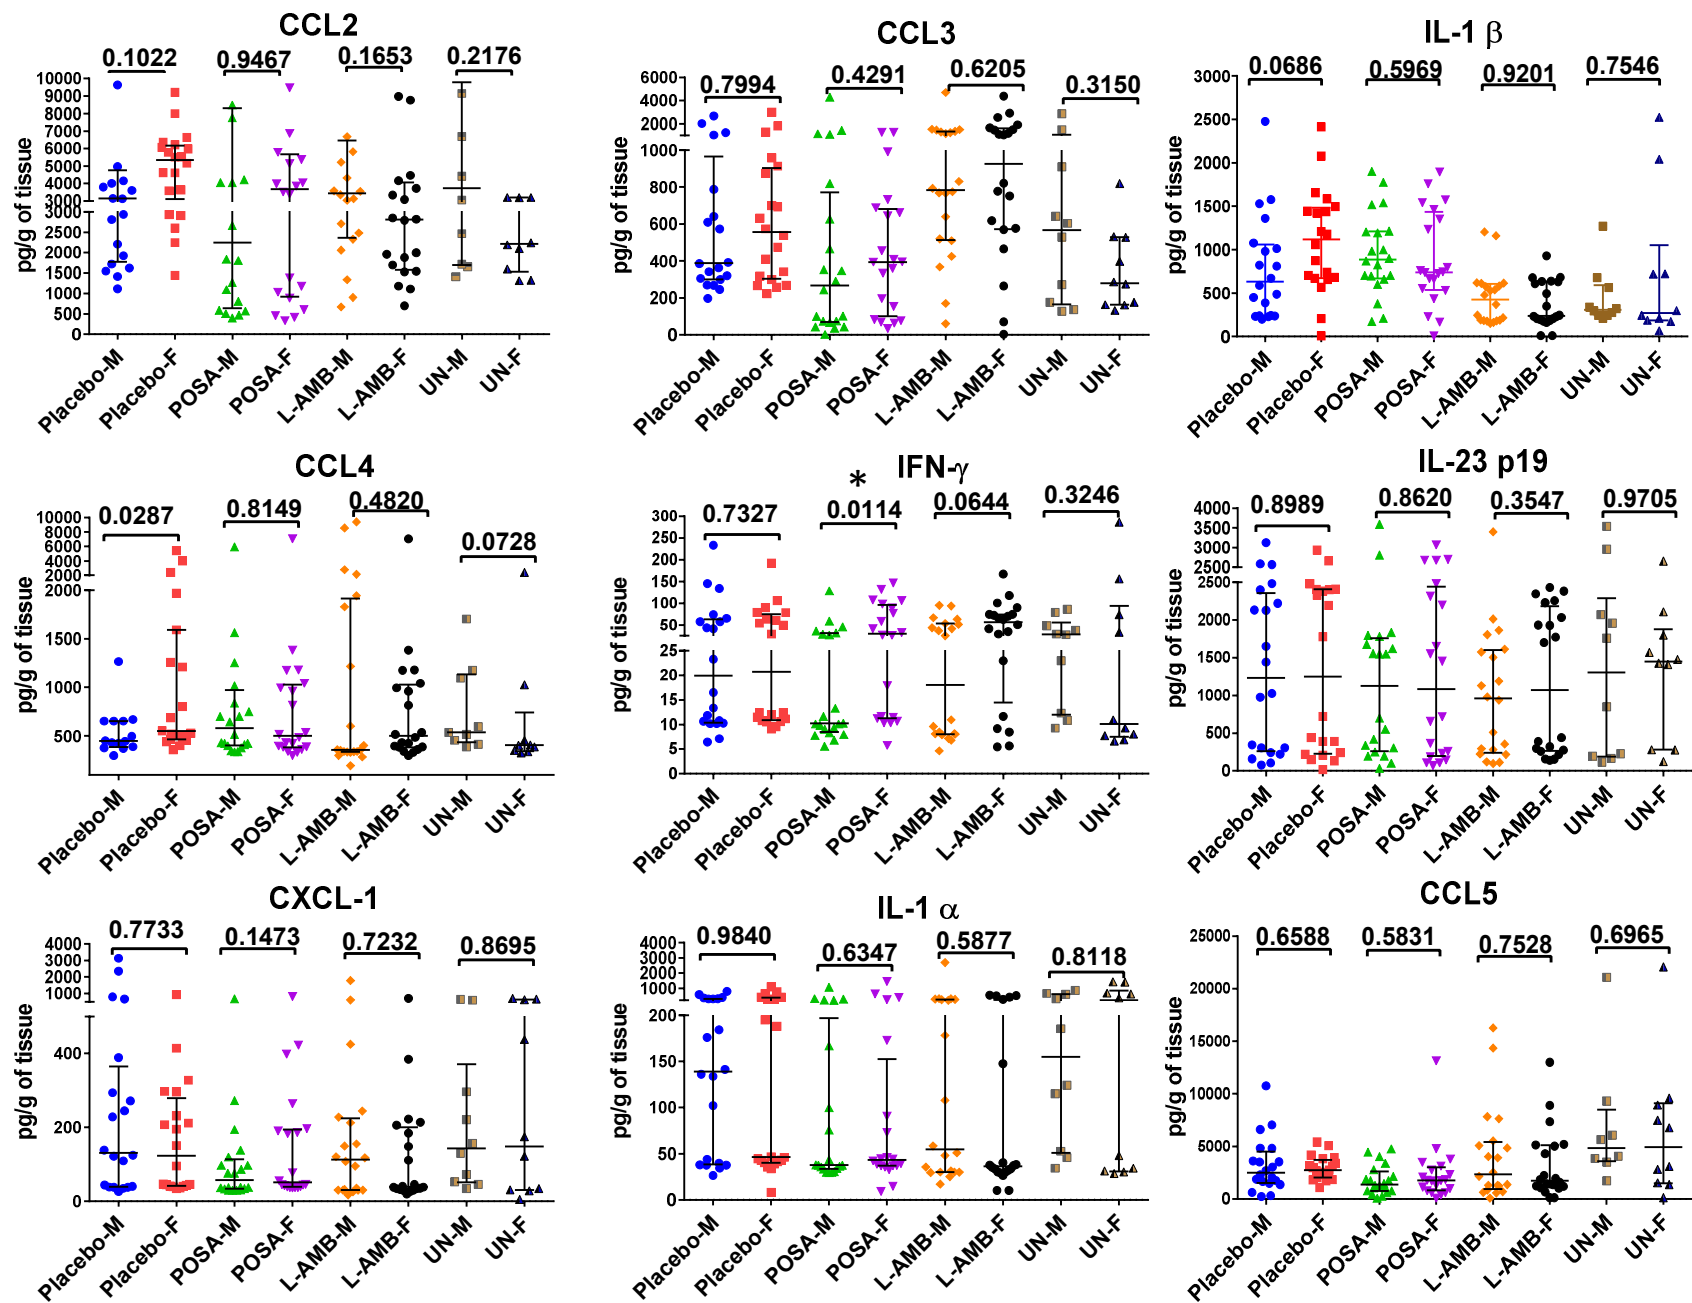

Figure S1

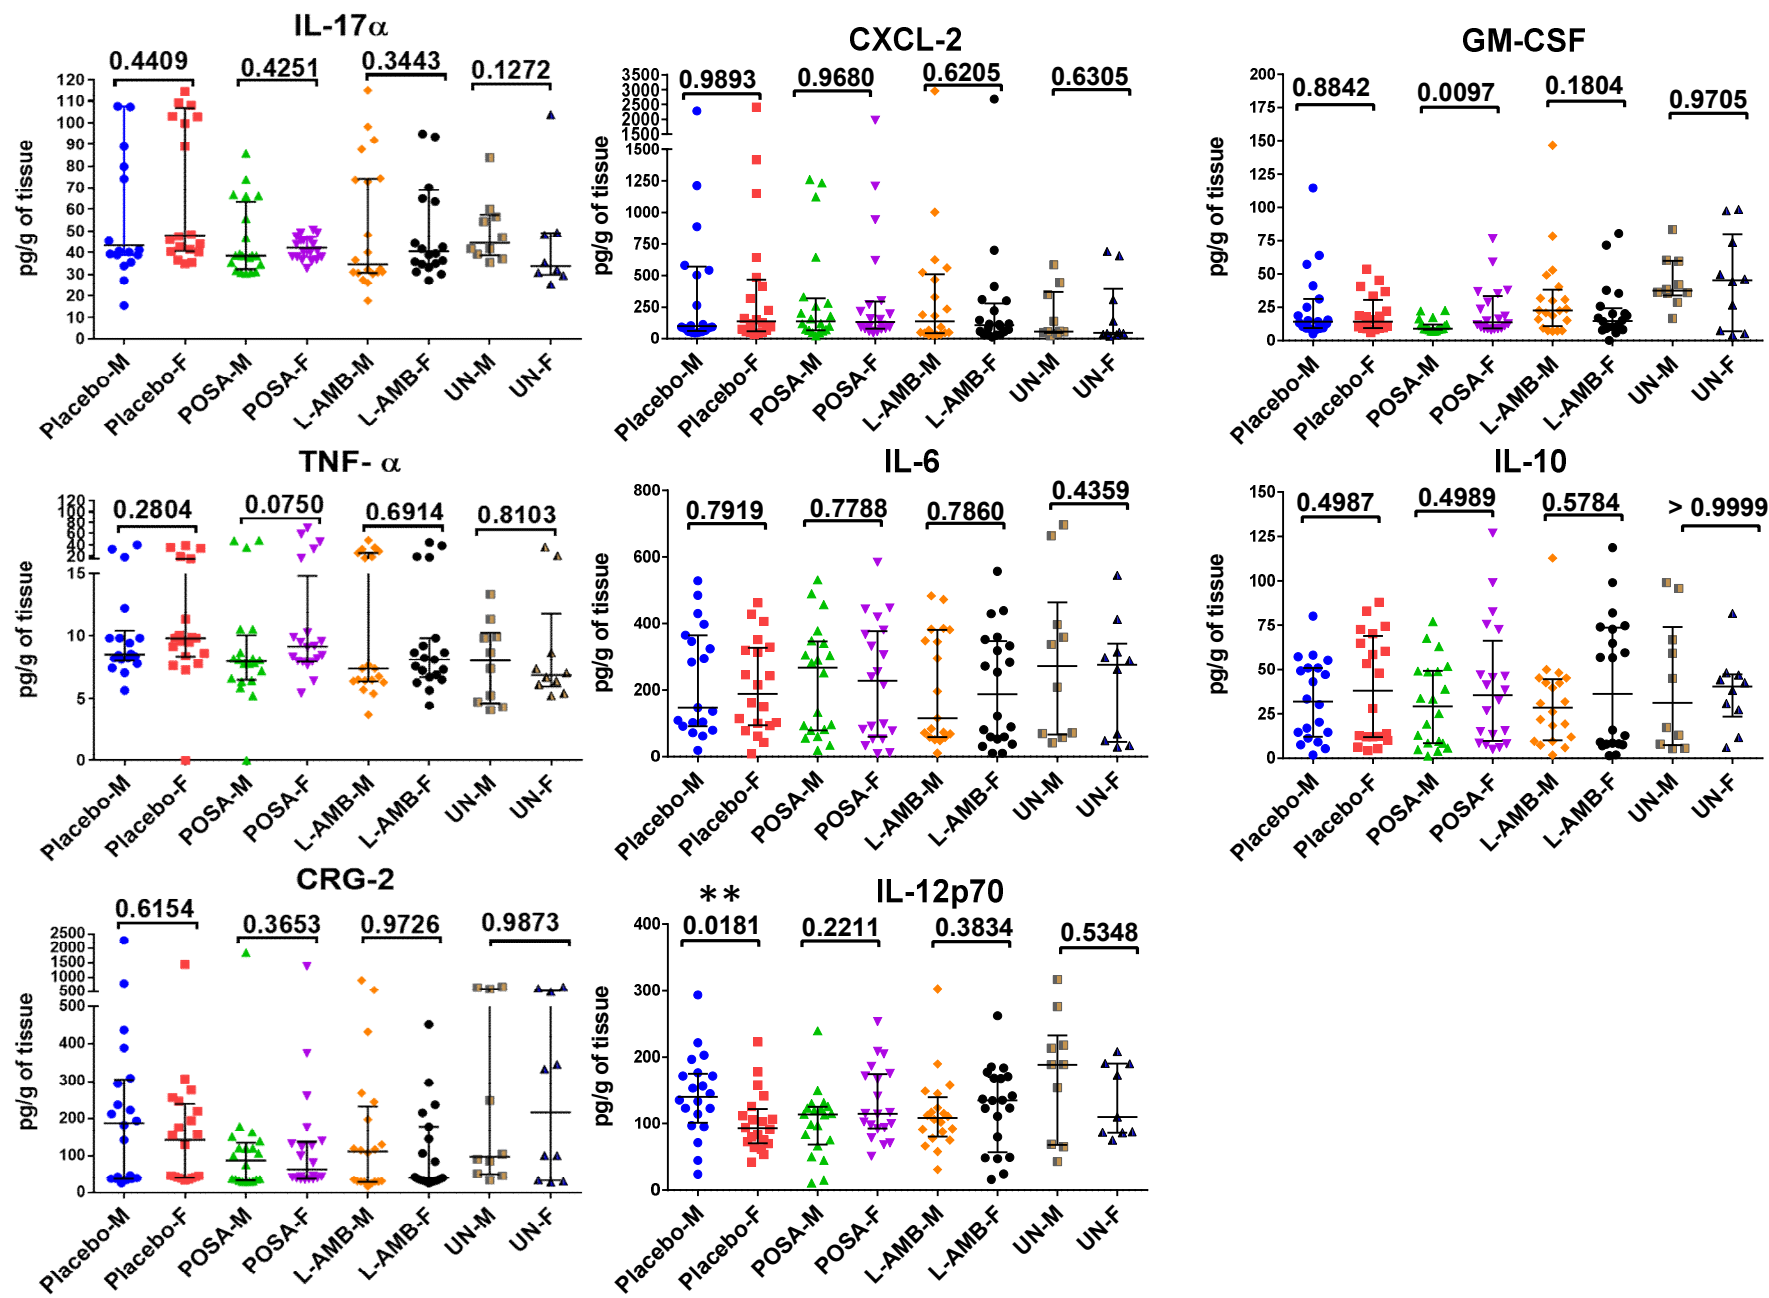

**Figure S1.** Cytokine analysis of lung homogenate from female or male DKA mice infected with *R. delemar*. Lung homogenate cytokines (n=20 from two independent experiments) were analyzed by luminex. \* $P = 0.01$  for interferon- $\gamma$  of POSA F vs. POSA M. \*\* $P = 0.02$  for IL-12p70 of Placebo F vs. Placebo M.

Figure S2

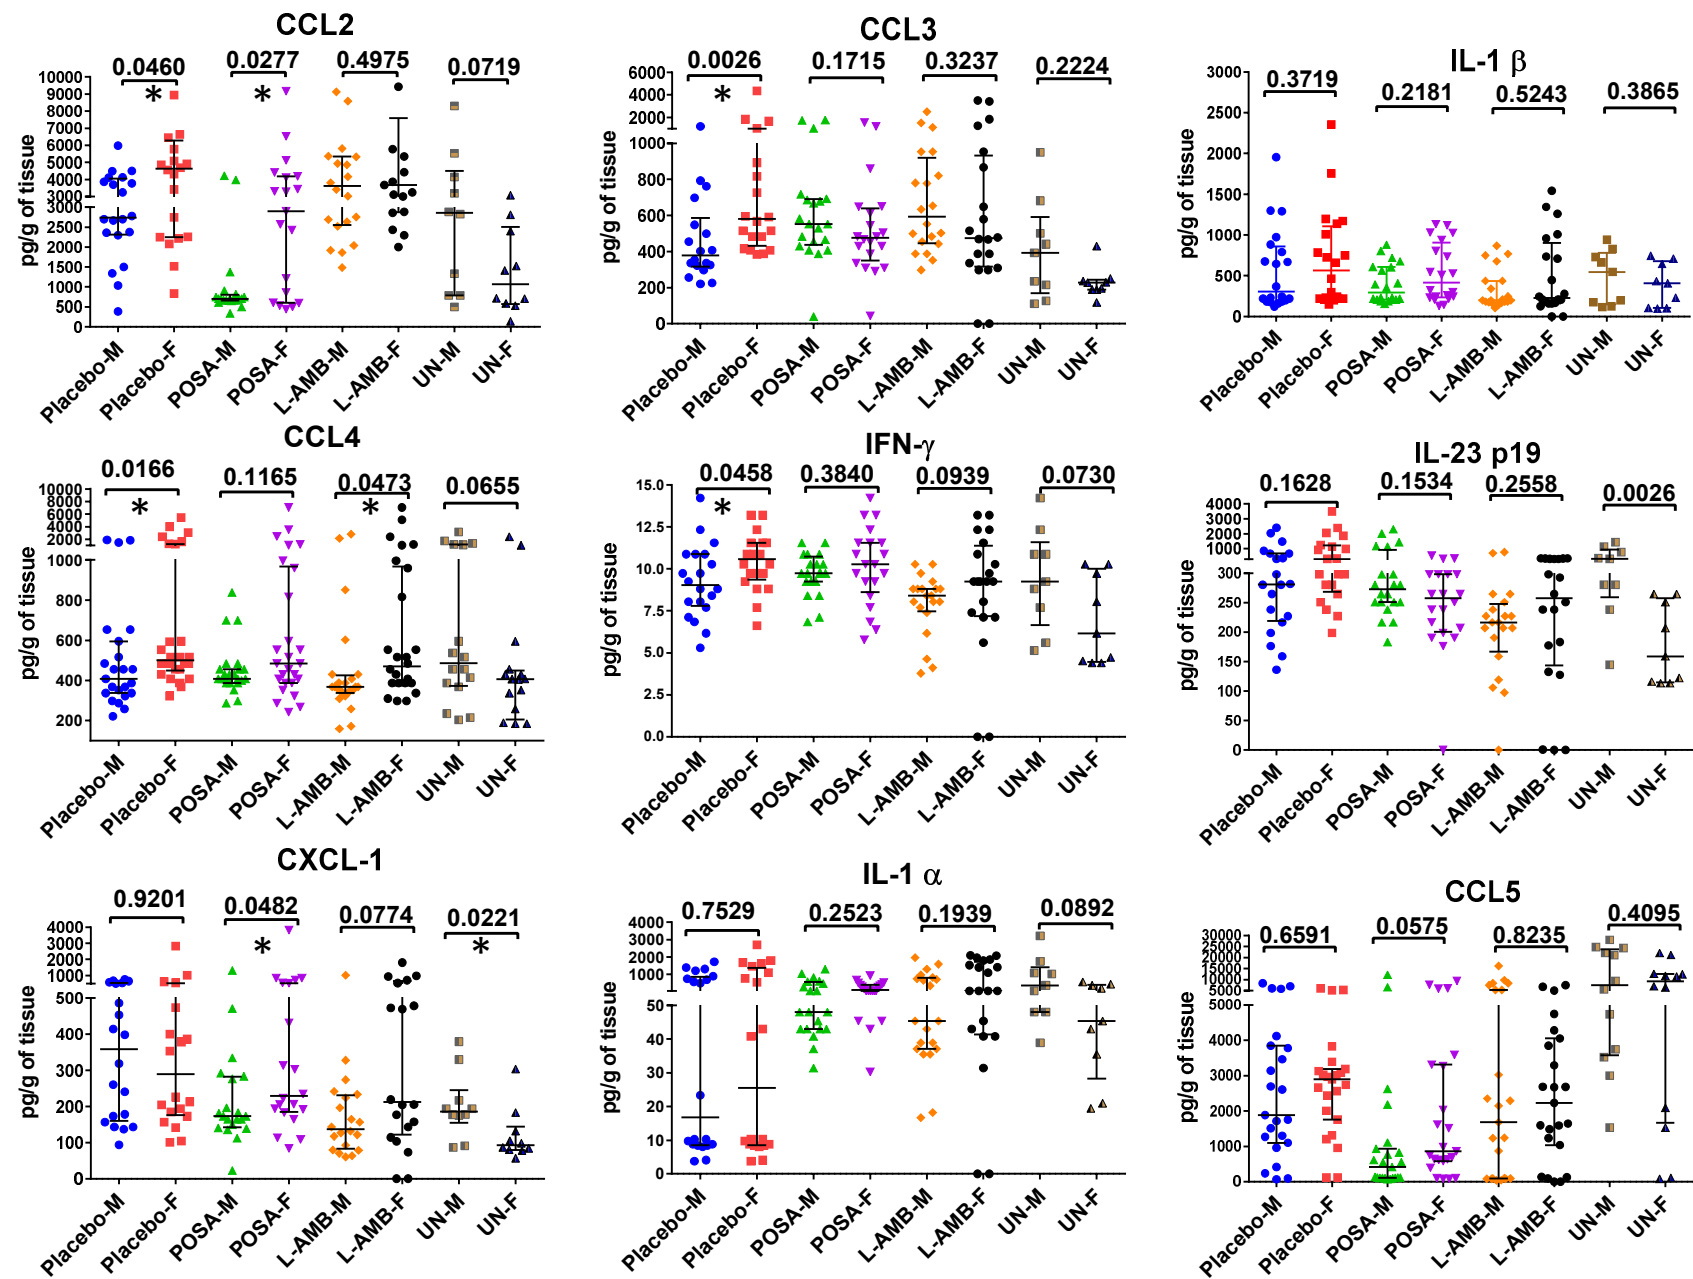

Figure S2

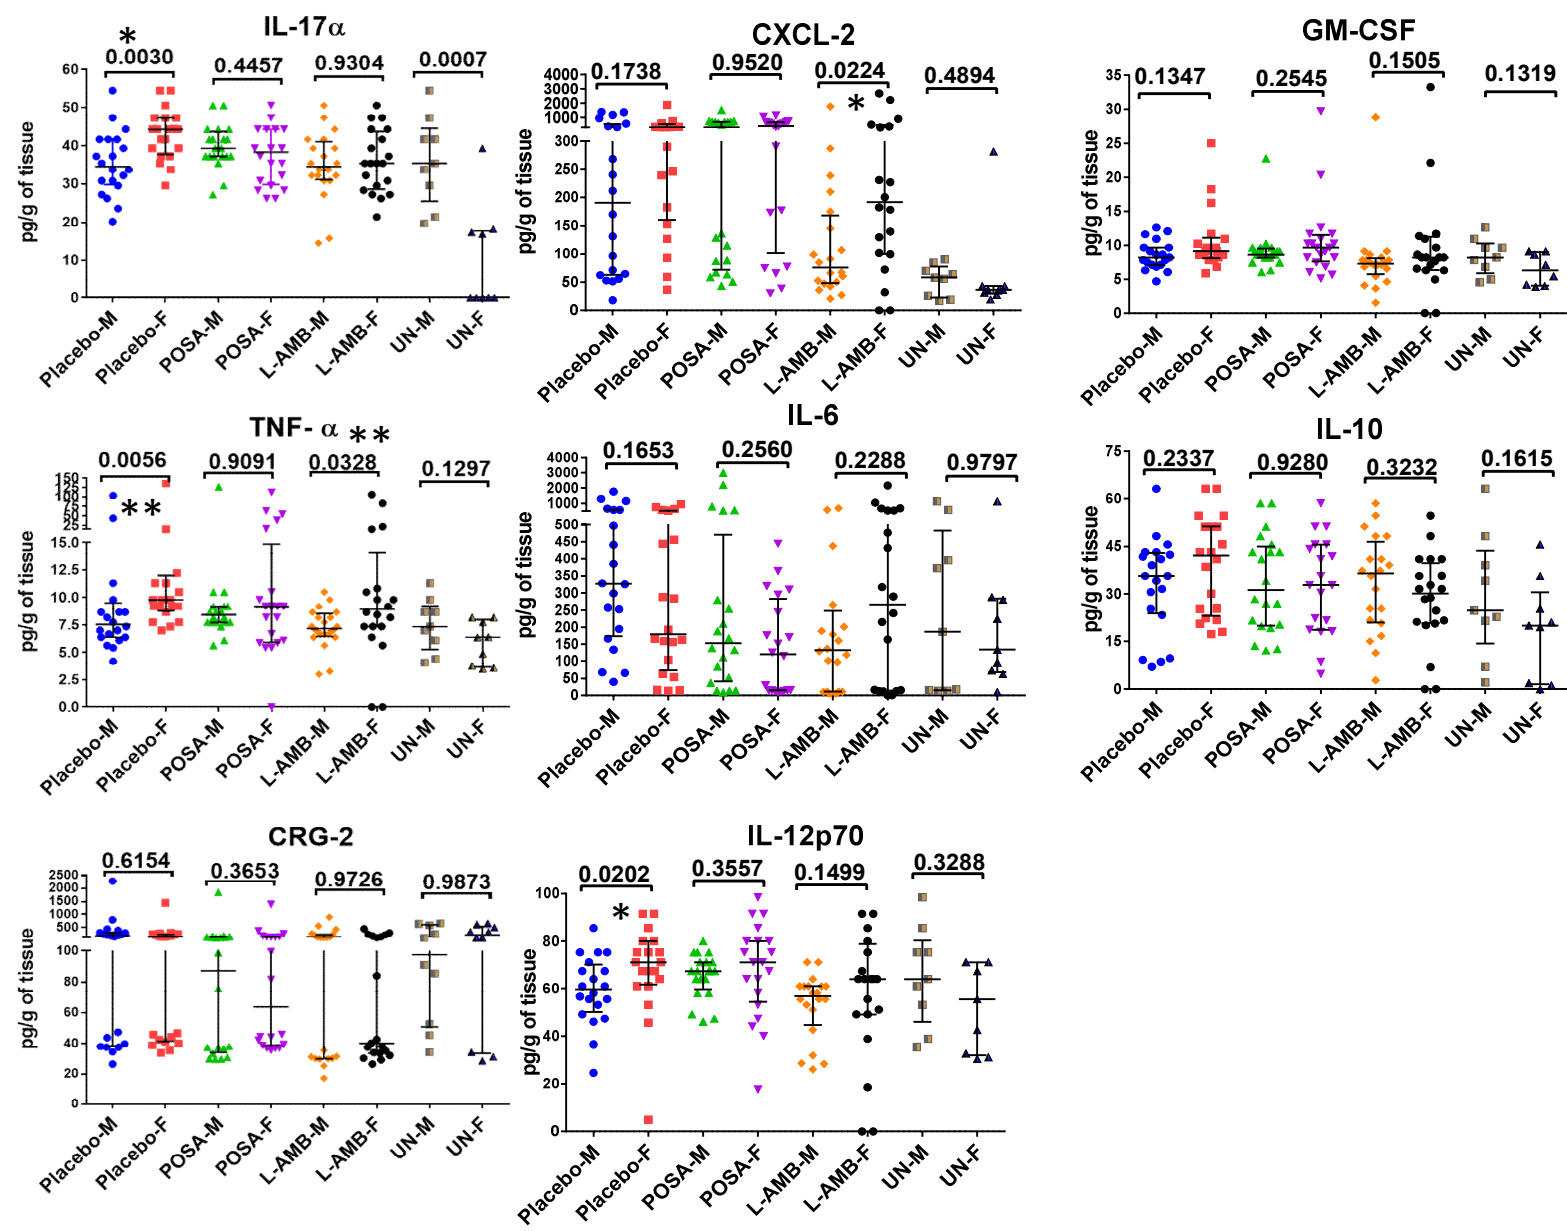

**Figure S2.** Cytokine analysis of lung homogenate from female or male DKA mice infected with *M. circinelloides f. jenssenii*. Lung homogenate cytokines (n=20 from two independent experiments) were analyzed by luminex. \* $P < 0.005$  for IL-17 $\alpha$  of Placebo F vs. Placebo M. \*\* $P < 0.05$  for TNF- $\alpha$  of L-AMB F vs. L-AMB M.

Figure S3

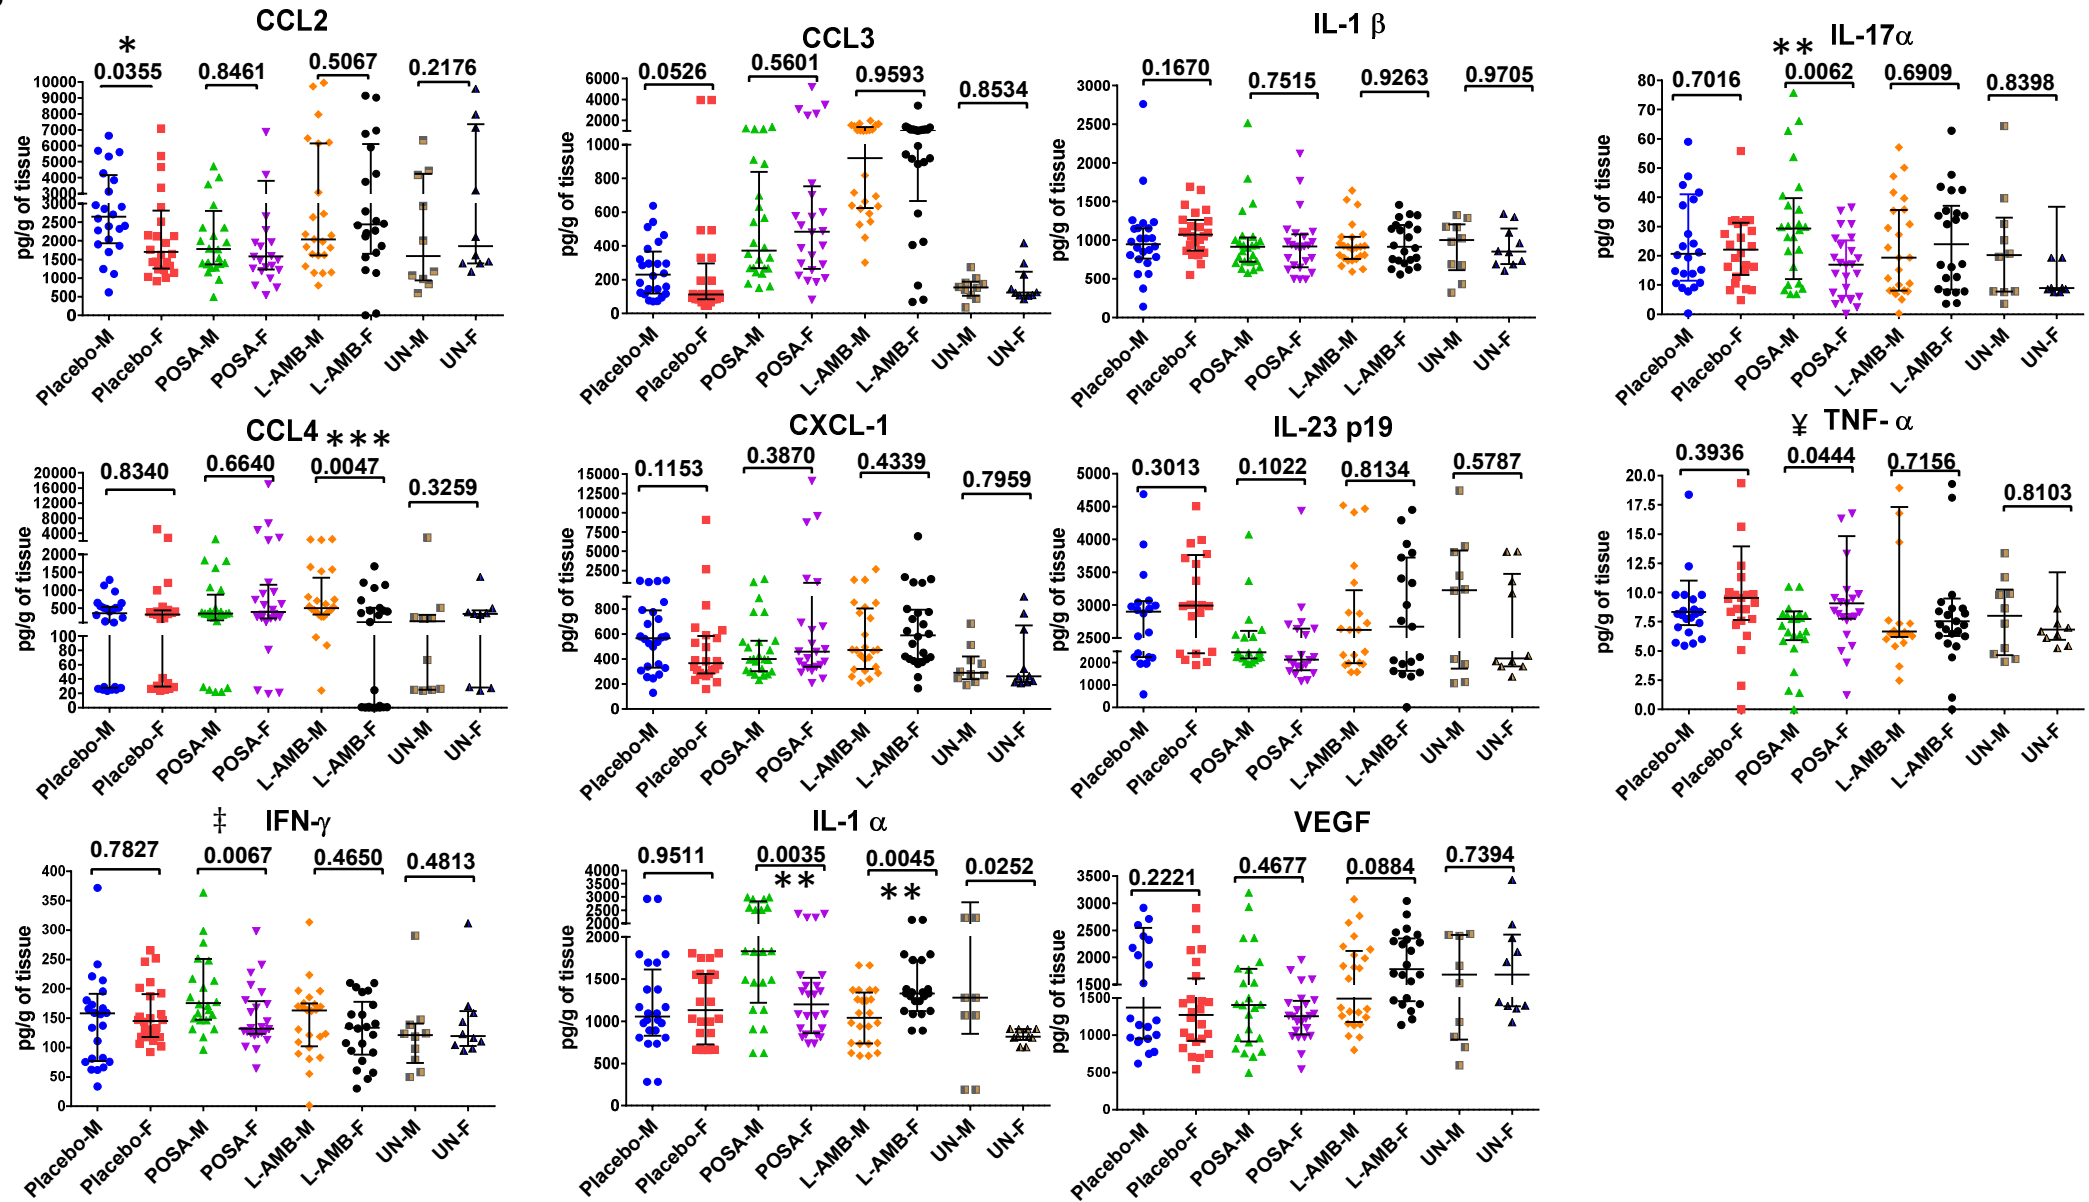

**Figure S3.** Cytokine analysis of lung homogenate from female or male neutropenic mice infected with *M. circinelloides f. jenssenii*. Lung homogenates cytokines (n=23 from two independent experiments) were analyzed by luminex. \* $P < 0.05$  for CCL2 of Placebo F vs. Placebo M. \*\* $P < 0.001$  for IL-17 $\alpha$  of POSA F vs. POSA M. \*\*\* $P < 0.005$  for CCL4 of L-AMB F vs. L-AMB M. \* $P < 0.05$  for POSA F vs. POSA M. ‡ $P < 0.01$  for POSA F vs. POSA M.
